# Supplementary material for: A Nodal enhanced micropeptide NEMEP regulates glucose uptake during mesendoderm differentiation of embryonic stem cells
Source: PubMed Central journal article supplement (PMC9271079; doi:10.1038/s41467-022-31762-x), 2022-07-09
Supplement: 41467_2022_31762_MOESM3_ESM.pdf [file 41467_2022_31762_MOESM3_ESM.pdf]

## **Description of Additional Supplementary Files**

**Supplementary Data 1:** Mass spectrometry analysis of co-purified proteins of GFP-EV and GFP-NEMEP.
